# Supplementary material for: One-pot carbonization enrichment of nitrogen in microporous carbon spheres for efficient CO2 capture
Source: Royal Society of Chemistry journal article supplement (doi:10.1039/c6ta09782k), 2016-11-24
Supplement: c6ta09782k1.pdf [file c6ta09782k1.pdf]

## Electronic Supplementary Information

### One-pot carbonization enrichment of nitrogen in microporous carbon spheres for efficient CO<sub>2</sub> capture

Lei Liu,<sup>a,b</sup> Zheng-Hu Xie,<sup>c</sup> Qing-Fang Deng,<sup>c</sup> Xiao-Xu Hou<sup>c</sup> and Zhong-Yong Yuan<sup>a,c\*</sup>

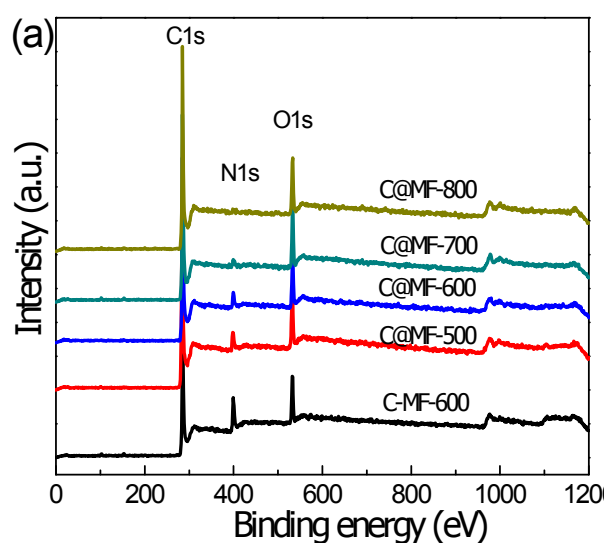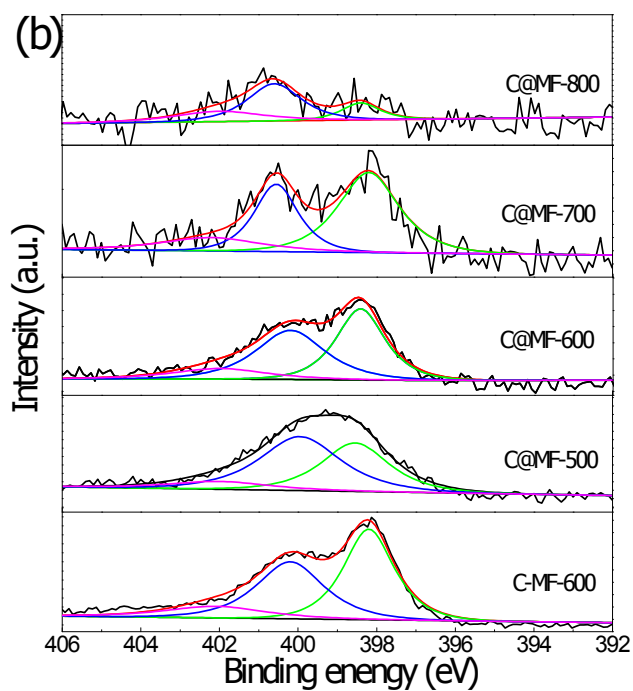

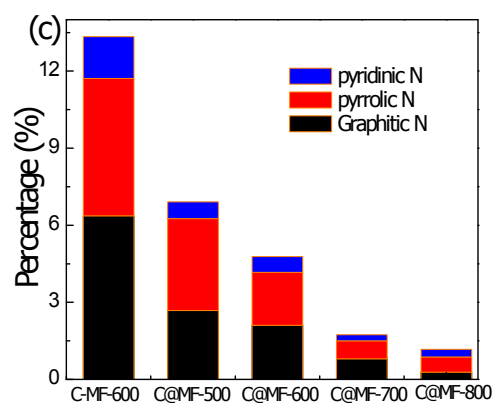

**Fig. S1** (a) X-ray photoelectron survey spectra; (b) high-resolution N 1s spectra and (c) nitrogen content and different nitrogen state distributions.

**Table S1.** The XPS analysis of C-MF-600 and C@MF-*x* samples about the nitrogen content and the relative surface concentrations of nitrogen species obtained by fitting the N1s core level XPS spectra.

| Sample   | N/(C+N)<br>(at.%) | Pyridinic N<br>(%) | Pyrrolic N<br>(%) | Graphitic N<br>(%) |
|----------|-------------------|--------------------|-------------------|--------------------|
| C-MF-600 | 13.34             | 47.8               | 40.0              | 12.2               |
| C@MF-500 | 6.91              | 38.8               | 51.8              | 9.4                |
| C@MF-600 | 4.78              | 44.1               | 43.1              | 12.8               |
| C@MF-700 | 1.74              | 46.1               | 40.1              | 13.8               |
| C@MF-800 | 1.17              | 23.1               | 51.4              | 25.5               |
